# Supplementary material
Source: Springer Nature journal article supplement (https://www.springermedizin.de/resource/supplementary/12990_2008_158_MOESM3_ESM.pdf/9612690)

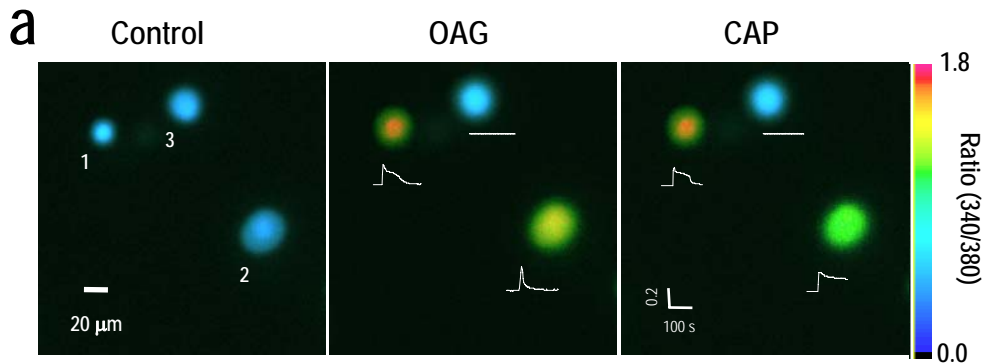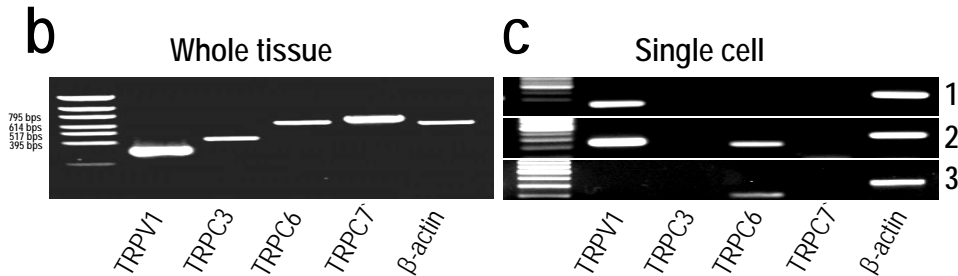

Supplement: MOESM3 [file 9612690]
